# Supplementary material for: Stress factors resulting from the Arctic vernal sea-ice melt
Source: Oxford University Press journal article supplement (doi:10.1525/elementa.076), 2020-01-01
Supplement: eic_accepted_supplemental_material.docx [file eic_accepted_supplemental_material.docx]

**Supplemental material**

Article title: Stress factors resulting from the Arctic vernal sea-ice melt: Impact on the viability of bacterial communities associated with sympagic algae

Rémi Amirauxa,b,c, Christopher Burota, Patricia Bonina, Guillaume Massé c, Sophie Guascoa, Marcel Babinc, Frédéric Vaultiera, Jean-François Rontania*

a Aix-Marseille University, Université de Toulon, CNRS/INSU/IRD, Mediterranean Institute of Oceanography (MIO), UM 110, 13288 Marseille, France

b UMR 6539 Laboratoire des Sciences de l’Environnement Marin (CNRS, UBO, IRD, Ifremer) Institut Universitaire Européen de la Mer (IUEM) Plouzané, France

c Takuvik Joint International Laboratory, Laval University (Canada) - CNRS, Département de biologie, Université Laval, Québec G1V 0A6, Québec, Canada

* Corresponding author. Tel.: +33-4-86-09-06-02; fax: +33-4-91-82-96-41. *E-mail address*: jean-francois.rontani@mio.osupytheas.fr (J.-F. Rontani)

**List of Contents:**

**Figure S1.  qPCR calibration curves for determining the number of bacterial 16S rDNA genes.** Example of (A) relative fluorescence vs. cycle number. Amplification curves are created when the fluorescent signal from each sample is plotted against cycle number; therefore, amplification plots represent the accumulation of product over the duration of the real-time PCR experiment. The samples used to create the plots are a dilution series of the target DNA sequence. Example of (B) a standard curve of real-time PCR data. A standard curve shows threshold cycle (Ct) on the y-axis and the starting quantity (SQ) of DNA target on the x-axis. Slope, y-intercept, and correlation coefficient values are used to provide information about the performance of the reaction.

**Figure S2. Temporal evolution of sea-ice properties.** Time series of (A) sea-ice temperature, (B) bulk salinity, and (C) brine salinity as a function of depth, where mean sea-ice thickness is indicated by the black line (adapted from Oziel et al., 2019).

**Figure S3. Temporal evolution of mean bulk salinity in sea ice.** Time series of mean bulk salinity in the whole sea-ice core. Error bars are standard deviation of the mean (n = 11–15).

**Figure S4. TIC chromatogram of the total lipid extract in sinking particles.** TIC chromatogram of the total lipid extract of sinking particles collected at 2 m on 15 June, showing the presence of C20:1Δ11 and C22:1Δ11 alcohols and acids.

**Figure S5. Time series of bacterial osmotic stress signals in the near-bottom 3–10 cm sea-ice section.** Time series of *trans/cis* ratios in the near-bottom 3–10 cm sea-ice section from 18 May to 29 June 2016 at the sampling location in Davis Strait (Figure 1). The dashed horizontal line indicates the threshold stress value of 0.1 as defined by Guckert et al. (1986). Error bars represent the standard deviation of the dimethyldisulphide (DMDS) derivative peak integration (n = 3).

**Table S1. qPCR raw data for determination of the percentage of dead bacteria.**

**Table S2. Relative fatty acid composition of sea ice and sediment trap samples.**

**Figure S1.  qPCR calibration curves for determining the number of bacterial 16S rDNA genes.** Example of (A) relative fluorescence vs. cycle number. Amplification curves are created when the fluorescent signal from each sample is plotted against cycle number; therefore, amplification plots represent the accumulation of product over the duration of the real-time PCR experiment. The samples used to create the plots are a dilution series of the target DNA sequence. Example of (B) a standard curve of real-time PCR data. A standard curve shows threshold cycle (Ct) on the y-axis and the starting quantity (SQ) of DNA target on the x-axis. Slope, y-intercept, and correlation coefficient values are used to provide information about the performance of the reaction.

**Figure S2. Temporal evolution of sea-ice properties.** Time series of (A) sea-ice temperature, (B) bulk salinity, and (C) brine salinity as a function of depth, where mean sea-ice thickness is indicated by the black line (adapted from Oziel et al., 2019).

**Figure S3. Temporal evolution of mean bulk salinity in sea ice.** Time series of mean bulk salinity in the whole sea-ice core. Error bars are standard deviation of the mean (n = 11–15).

**Figure S4. TIC chromatogram of the total lipid extract in sinking particles.** TIC chromatogram of the total lipid extract of sinking particles collected at 2 m on 15 June, showing the presence of C20:1Δ11 and C22:1Δ11 alcohols and acids.

**Figure S5. Time series of bacterial osmotic stress signals in the near-bottom 3–10 cm sea-ice section.** Time series of *trans/cis* ratios in the near-bottom 3–10 cm sea-ice section from 18 May to 29 June 2016 at the sampling location in Davis Strait (**Figure 1**). The dashed horizontal line indicates the threshold stress value of 0.1 as defined by Guckert et al. (1986). Error bars represent the standard deviation of the dimethyldisulphide (DMDS) derivative peak integration (n = 3).

**Table S1. qPCR raw data for determination of the percentage of dead bacteria.**

| **Sample type** | **Date in 2016 (day/month)** | **SQ-PMAa** | **SQ-noPMAb** | **Dead bacteria (%)** | **Mean dead bacteria (%)** | **SD** |
| --- | --- | --- | --- | --- | --- | --- |
| Sea ice (bottom 0–3 cm) | 18-mai | 9.66 x 101 | 1.16 x 102 | 16.5 | 12.2 | 4.3 |
| 2.84 x 102 | 3.09 x 102 | 7.9 |
| 20-mai | 1.15 x 102 | 1.09 x 102 | –5.5 | –7.6c | 2.1 |
| 1.36 x 102 | 1.24 x 102 | –9.6 |
| 27-mai | 1.11 x 102 | 1.48 x 102 | 25.1 | 18.6 | 6.5 |
| 5.96 x 102 | 6.79 x 102 | 12.1 |
| 01-juin | 1.54 x 102 | 3.41 x 102 | 54.7 | 40.4 | 14.3 |
| 1.91 x 102 | 2.58 x 102 | 26.1 |
| 08-juin | 8.81 x 101 | 1.40 x 102 | 37.2 | 39.1 | 1.8 |
| 9.08 x 101 | 1.54 x 102 | 40.9 |
| 15-juin | 8.06 x 101 | 4.19 x 102 | 80.8 | 74.9 | 5.9 |
| 8.38 x 101 | 2.70 x 102 | 69 |
| 22-juin | 1.15 x 102 | 1.61 x 102 | 28.8 | 22.8 | 6 |
| 1.16 x 102 | 1.40 x 102 | 16.8 |
| 29-juin | 8.02 x 101 | 1.41 x 102 | 43.2 | 40.2 | 3 |
| 1.70 x 102 | 2.70 x 102 | 37.2 |
| Sediment trap (2-m depth) | 20-mai | 2.22 x 101 | 3.18 x 101 | 30.1 | 22.2 | 7.9 |
| 1.64 x 101 | 1.91 x 101 | 14.4 |
| 27-mai | 1.93 x 101 | 4.11 x 101 | 53 | 48.3 | 4.7 |
| 2.49 x 101 | 4.42 x 101 | 43.6 |
| 01-juin | 3.83 x 101 | 3.96 x 101 | 3.3 | 5.2 | 1.8 |
| 5.14 x 101 | 5.53 x 101 | 7 |
| 08-juin | 1.51 x 101 | 1.40 x 101 | –8.0 | –5.0 | 2.9 |
| 8.74 x 100 | 8.56 x 100 | –2.1 |
| 15-juin | 5.99 x 101 | 5.70 x 101 | –5.1 | –5.3 | 0.2 |
| 1.15 x 102 | 1.09 x 102 | –5.5 |
| 22-juin | 1.10 x 101 | 2.88 x 101 | 61.9 | 63.9 | 2 |
| 4.11 x 101 | 1.20 x 102 | 65.9 |
| 29-juin | 1.50 x 102 | 3.66 x 102 | 58.9 | 43.5 | 15.4 |
| 3.81 x 101 | 5.31 x 101 | 28.2 |
| Sediment trap (25-m depth) | 18-mai | 1.43 x 101 | 2.19 x 101 | 34.7 | 29.5 | 5.2 |
| 3.66 x 101 | 4.84 x 101 | 24.3 |
| 20-mai | 6.24 x 100 | 6.48 x 100 | 3.8 | 3.2 | 0.6 |
| 2.19 x 101 | 2.25 x 101 | 2.6 |
| 27-mai | 1.48 x 101 | 1.43 x 101 | –3.3 | –2.9 | 0.3 |
| 2.60 x 101 | 2.53 x 101 | –2.6 |
| 01-juin | 2.80 x 101 | 1.01 x 102 | 72.2 | 68.3 | 3.9 |
| 5.06 x 101 | 1.42 x 102 | 64.3 |
| 08-juin | 6.08 x 101 | 1.05 x 102 | 41.8 | 35.6 | 6.3 |
| 5.80 x 101 | 8.19 x 101 | 29.3 |
| 15-juin | 2.22 x 102 | 2.16 x 102 | –2.9 | –2.2 | 0.7 |
| 3.13 x 102 | 3.08 x 102 | –1.5 |
| 22-juin | 6.61 x 100 | 2.30 x 101 | 71.2 | 71.3 | 0.1 |
| 3.09 x 101 | 1.08 x 102 | 71.3 |
| 29-juin | 5.24 x 101 | 6.65 x 101 | 21.2 | 20.9 | 0.3 |
| 7.07 x 101 | 8.90 x 101 | 20.6 |

**a** SQ-PMA indicates thestarting quantity (SQ) of the number of targeted genes in the PCR mix before amplification of DNA extracted from samples treated with propidium monoazide (PMA).

**b** SQ-noPMA indicates theSQ of the number of targeted genes in the PCR mix before amplification of DNA from samples not treated with PMA.

**c** Negative values are reported in the main text as 0%.

**Table S2. Relative fatty acid composition of sea ice and sediment trap samples.**

| **Date in 2016 (day/month)** | **Sample typea** | **Relative fatty acid composition (% of total)** | | | | | | | | | | | |
| --- | --- | --- | --- | --- | --- | --- | --- | --- | --- | --- | --- | --- | --- |
| **C12:0** | **C14:0** | **C15:0** | **C16:4** | **C16:1w7** | **C16:0** | **C18:1w9** | **C18:1w7** | **C18:0** | **C20:5** | **C20:1** | **C22:6** |
| 17/5 | Ice 0–3 cm | 2.9 | 17.9 | 2.1 | – | 30.3 | 33.9 | 4.5 | 1.5 | 5.1 | 1.8 | – | – |
| Trap 2 m | –b | 1.1 | – | – | 1 | 26.4 | 5.5 | 1 | 65 | – | – | – |
| Trap 25 m | 1 | 6.9 | 3 | – | 7.9 | 37.9 | 4.5 | 1.4 | 18.7 | 18.7 | – | – |
| 20/5 | Ice 0–3 cm | 1 | 11.1 | 1.3 | 2.7 | 36.5 | 26.6 | 4.4 | 1.6 | 0.6 | 13.3 | – | 0.9 |
| Trap 2 m | 1.9 | 8.2 | 3.1 | – | 5.3 | 53.1 | 2.9 | – | 25.5 | – | – | – |
| Trap 25 m | 1.3 | 6.4 | 3.6 | – | 8.7 | 38 | 7.8 | 1 | 28 | 5.2 | – | – |
| 27/5 | Ice 0–3 cm | 1.9 | 13.7 | 1.2 | 5.8 | 33.9 | 20.7 | 7 | 1.5 | 7.1 | 7.2 | – | – |
| Trap 2 m | 1.1 | 6.2 | 1.6 | – | 14.9 | 42.3 | 6.1 | 0.9 | 26.9 | – | – | – |
| Trap 25 m | 1.5 | 11 | 2 | – | 21.6 | 43.4 | 4.2 | 1.2 | 15.1 | – | – | – |
| 1/6 | Ice 0–3 cm | – | 6.3 | – | – | 39.2 | 32.3 | – | – | – | 19.6 | – | 2.6 |
| Trap 2 m | 1.5 | 6.6 | 2 | – | 8 | 42.2 | 11.1 | 0.8 | 27.8 | – | – | – |
| Trap 25 m | 1.6 | 8 | 3 | – | 15.6 | 40.1 | 11.5 | 3.7 | 16.5 | – | – | – |
| 8/6 | Ice 0–3 cm | – | 17.2 | 0.8 | – | 50.7 | 28.9 | 1.3 | 0.5 | 0.6 | – | – | – |
| Trap 2 m | 1.6 | 8.4 | 2.2 | – | 18.1 | 45.9 | 7.6 | 0.8 | 15.4 | – | – | – |
| Trap 25 m | 1.5 | 11.1 | 3.5 | – | 18.1 | 46.8 | 7.6 | 1.9 | 9.5 | – | – | – |
| 15/6 | Ice 0–3 cm | – | 13.3 | 1.2 | – | 50.6 | 23.8 | 4.4 | 0.6 | 2.1 | 4 | – | – |
| Trap 2 m | 0.2 | 3 | 0.6 | – | 26.5 | 18.7 | 10.3 | 3.6 | 10.9 | 12.2 | 8.8 | 5.2 |
| Trap 25 m | 0.8 | 17.8 | 1.9 | – | 41.1 | 30.5 | 3 | 1 | 3.4 | – | 0.5 | – |
| 22/6 | Ice 0–3 cm | – | 14.1 | 0.6 | – | 54.3 | 20.8 | 2.8 | 1.6 | 2.2 | 3.6 | – | – |
| Trap 2 m | – | 7 | 1 | – | 54.2 | 37 | 0.6 | – | 0.2 | – | – | – |
| Trap 25 m | – | 13.7 | – | – | 58.8 | 26.4 | 0.9 | – | 0.2 | – | – | – |
| 29/6 | Ice 0–3 cm | – | 9.7 | 0.8 | – | 60.2 | 24.6 | 1.6 | 1.4 | 1.7 | – | – | – |
| Trap 2 m | – | 16.5 | 0.8 | – | 54.1 | 22.8 | 2.6 | 1 | 1.3 | 0.9 | – | – |
| Trap 25 m | – | 12.9 | 0.8 | – | 54.3 | 27.9 | 2.1 | 0.8 | 1.2 | – | – | – |

a Sea ice samples from bottommost 0–3 cm; sediment trap samples from 2-m and 25-m depths

b Not detected
